# Supplementary material for: The association between the triglyceride–glucose index and the risk of cardiovascular disease in US population aged ≤ 65 years with prediabetes or diabetes: a population-based study
Source: Springer Nature journal article supplement (doi:10.1186/s12933-024-02261-8), 2024-05-13

**Supplemental Figure 1** The restricted cubic spline (RCS) analysis between the TyG index and the risk of CVD in participants with diabetes (DM) or prediabetes (PreDM).

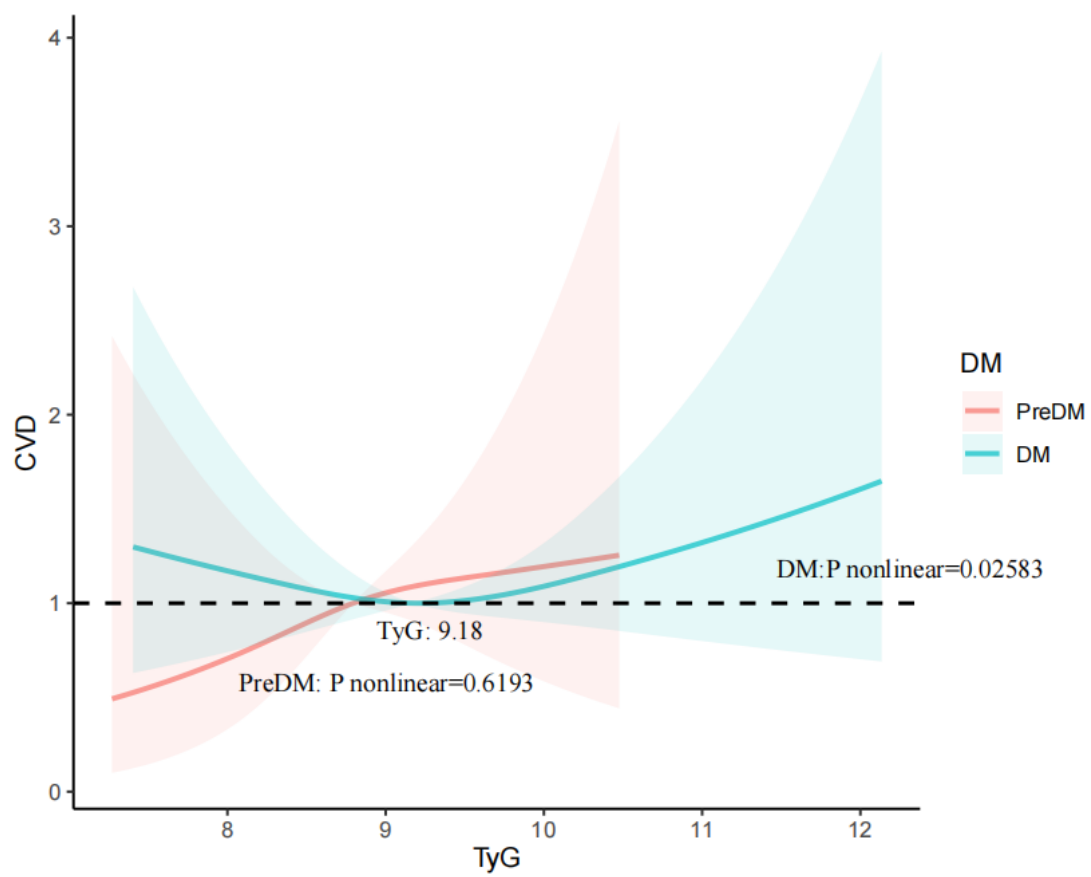

Supplement: MOESM1 [file 12933_2024_2261_MOESM1_ESM.pdf]
